## **Aerobic heterotrophy and RuBisCO-mediated CO<sub>2</sub> metabolism in marine *Thaumarchaeota***

Linta Reji<sup>1</sup> and Christopher A. Francis\*<sup>1</sup>

<sup>1</sup>Earth System Science, Stanford University, CA

\*Corresponding author

Email: [caf@stanford.edu](mailto:caf@stanford.edu)

**Running title:** Genomic potential of pSL12-like *Thaumarchaeota*

**Keywords:** *Thaumarchaeota*, pSL12, RuBisCO

## 1 **Abstract**

2 *Thaumarchaeota* constitute an abundant and ubiquitous phylum of Archaea that play critical  
3 roles in the global nitrogen and carbon cycles. Most well-characterized members of the phylum  
4 are chemolithoautotrophic ammonia-oxidizing archaea (AOA), which comprise up to 5 and 20 %  
5 of the total single-celled life in soil and marine systems, respectively. Using two high-quality  
6 metagenome-assembled genomes (MAGs), here we describe a divergent marine thaumarchaeal  
7 clade that is devoid of the ammonia-oxidation machinery and the AOA-specific carbon-fixation  
8 pathway. Phylogenomic analyses placed these genomes within the uncultivated and largely  
9 understudied marine pSL12-like thaumarchaeal clade. The predominant mode of nutrient  
10 acquisition appears to be aerobic heterotrophy, evidenced by the presence of respiratory  
11 complexes and various organic carbon degradation pathways. Unexpectedly, both genomes  
12 encoded a form III RuBisCO. Genomic composition of the MAGs is consistent with the role of  
13 RuBisCO in nucleotide salvage, as has been proposed previously for archaea harboring the form  
14 III variant. Metabolic reconstructions revealed a complete nonoxidative pentose phosphate  
15 pathway (PPP) and gluconeogenesis, which can cyclize the RuBisCO-mediated carbon metabolic  
16 pathway. We conclude that these genomes represent a hitherto unrecognized evolutionary link  
17 between predominantly anaerobic basal thaumarchaeal lineages and mesophilic marine AOA,  
18 with important implications for diversification within the phylum *Thaumarchaeota*.

## 19 **Introduction**

20 Archaea of the phylum *Thaumarchaeota* are among the most abundant microorganisms on the  
21 planet, constituting up to 20 % of single-celled life in marine systems alone (1). Although most  
22 characterized members of *Thaumarchaeota* are ammonia-oxidizing archaea (AOA), the phylum

23 also encompasses several archaeal clades for which ammonia oxidation has not yet been  
24 demonstrated (e.g., Group 1.1c, and Group 1.3) (ref. 2). These basal, non-AOA members of the  
25 phylum have primarily been described in terrestrial systems such as anoxic peat soils (3),  
26 subsurface aquifer sediments (4), geothermal springs (5,6) and acidic forest soil (7). Availability  
27 of molecular oxygen on Earth is hypothesized to have influenced the evolution and habitat  
28 expansion of AOA from the basal anaerobic guilds (8).

29  
30 A deeply-branching marine thaumarchaeal clade that has eluded cultivation and genomic  
31 analysis efforts is the pSL12-like group, also referred to as Group 1A or ALOHA group. First  
32 detected by DeLong et al., (2006; ref. 9) in the North Pacific Subtropical Gyre at station  
33 ALOHA, this clade appeared to be divergent from Marine Group 1 (MG1) AOA, clustering with  
34 a hot spring-associated crenarchaeal 16S rRNA sequence pSL12 (10). Mincer et al. (2007; ref.  
35 11) suggested that at least some members of the clade may harbor the ammonia oxidation  
36 machinery, based on correlating abundances of the 16S rRNA gene and the *amoA* gene (*amoA*  
37 encodes the alpha-subunit of ammonia monooxygenase; conventionally used as the functional  
38 marker for AOA). The only available genomic information for the pSL12-like lineage comes  
39 from a fosmid clone library generated from the Mediterranean Sea (12). One of the three pSL12-  
40 like fosmid sequences recovered by Martin-Cuadrado and colleagues (2008; ref. 12) contained  
41 genes putatively involved in nitrogen fixation; however, there has not been genomic or  
42 biogeochemical evidence supporting this observation since. Several SSU rRNA gene surveys  
43 have detected the pSL12-like group in various marine systems such as the Atlantic Ocean (13),  
44 Mediterranean Sea (14), multiple Pacific Ocean transects (15), and the Northern Gulf of Mexico

45 (16). Despite their suggested roles in N-cycle transformations, the metabolic adaptations of the  
46 pSL12-like lineage remain an open question.

47

48 Here we analyze the genomic repertoire and metabolic strategies of the pSL12-like lineage,  
49 based on two metagenome-assembled genomes (MAGs) obtained from seawater incubation  
50 metagenomes. In particular, we propose the existence of a form III RuBisCO-mediated CO<sub>2</sub>  
51 fixation pathway in this clade, supporting heterotrophic growth on various carbon compounds.  
52 The high degree of phylogenetic and metabolic separation between these MAGs and typical  
53 marine thaumarchaeal clades suggests that the pSL12-like lineage represents an evolutionary link  
54 between anaerobic basal clades of *Thaumarchaeota* and aerobic marine ammonia-oxidizers.

## 55 **Materials and Methods**

### 56 *Sample collection, incubation, and DNA extraction*

57 Water column samples for AOA enrichment incubations were collected from Monterey Bay, CA,  
58 in May 2010. ASW2 was collected from 150 m at station M1 (36.747 N, -122.022 W), and  
59 ASW8 was collected from 200 m at station M2 further offshore (36.697 N, -122.378 W). After 8  
60 years of incubation at 12 °C, 925 and 1000 mL each of the samples (for ASW2 and ASW8,  
61 respectively) were filtered using a 0.22 µm filter (Supor, Pall Inc, New York, USA). DNA was  
62 extracted using the DNeasy kit (Qiagen, Valencia, CA, USA), following the manufacturer's  
63 protocol. To maximize DNA yield, DNeasy capture columns were eluted twice with 50 mL each  
64 of elution buffer, resulting in 100 mL total elution volume for each sample. DNA concentration  
65 was measured using Qubit Fluorometer (Invitrogen, NY, USA); 1.41 and 1.88 µg/ml DNA was  
66 obtained from ASW2 and ASW8, respectively.

67 *Metagenome sequencing, assembly and binning*

68 Metagenome sequencing was performed as a part of a Community Science Program project with  
69 the DOE Joint Genome Institute (JGI); the samples were sequenced (2 x 151 bp) using the HiSeq  
70 2000 1TB platform. Read quality-filtering was carried out using the custom JGI script  
71 `jgi_mga_meta_rqc.py` (v2.0.0). Briefly, trimmed paired-end reads filtered using BBDuk (17)  
72 (v37.50; BBTtools software package, <http://bbtools.jgi.doe.gov>) were read-corrected using BFC  
73 (v.r181; ref. 18). Reads without a mate pair were removed.

74  
75 Quality-filtered reads were assembled using MEGAHIT (v1.1.3; ref. 19,20), using a range of k-  
76 mers (k=21,33,55,77,99,127). Contigs longer than 2000 bp were binned using two algorithms:  
77 MetaBAT2 (v2.12.1; ref. 21) and MaxBin2 (v2.2.6; ref. 22,23). Resulting bins were refined  
78 using the bin refinement module in metaWRAP (v1.2.2; ref. 24), and subsequently re-assembled  
79 using SPAdes (v3.13.0; ref. 25) to improve assembly quality. CheckM (v1.0.12; ref. 26) was  
80 used to assess bin completion. Taxonomic classifications were obtained using the GTDB-tk  
81 toolkit (v0.3.2; ref. 27). Dereplication based on average nucleotide identity was done using dRep  
82 (v2.3.2; ref. 28). Only bins with estimated completeness  $\geq 70$  % and contamination  $< 10$  % were  
83 retained for downstream analysis.

84 *MAG annotation and metabolic reconstruction*

85 Prodigal (v2.6.3; ref. 29) was used for gene prediction, and functional annotations were obtained  
86 using Prokka (v1.13.7; ref. 30). Additionally, the BlastKOALA and GhostKOALA tool servers  
87 (31) were used to obtain KO annotations for genes predicted by Prodigal. KEGG-decoder (32)  
88 was used to estimate pathway completeness based on KO annotations, and the results were

89 plotted in R (33). SEED annotations were obtained from the online Rapid Annotation using  
90 Subsystem Technology (RAST) server (34). Metabolic reconstructions were carried out using the  
91 ‘Reconstruct Pathway’ tool in KEGG mapper (<https://www.genome.jp/kegg/mapper.html>).  
92 TransportDB (v2.0; ref. 35) was used to predict membrane transporters; these annotations were  
93 further confirmed by BLASTp searches. SignalP-5.0 Server was used for signal peptide  
94 prediction (<http://www.cbs.dtu.dk/services/SignalP-5.0/>).

#### 95 *Phylogenetic analyses*

96 Anvi’o (v5.4; ref. 36) was used to compute a phylogenomic tree, based on a concatenated  
97 alignment of 30 ribosomal proteins obtained from the MAGs as well as selected reference  
98 genomes representing the known diversity within mesophilic *Thaumarchaeota*. MUSCLE (37)  
99 was used to generate the alignment. The final tree was computed using FastTree (38).

100

101 We used BLASTp (39) to search the MAGs for proteins of interest. Barnap (v0.9;  
102 <https://github.com/tseemann/barnap>) was used to identify ribosomal features. 16S rRNA  
103 sequences were aligned with reference sequences using MAFFT (40). RuBisCO reference  
104 sequences were obtained from Jaffe et al. (2009; ref. 41). Phylogenetic trees were computed  
105 using Mafft alignmnets in FastTree (38) with 1000 bootstrap replicates each. FastANI (42) was  
106 used to compute average nucleotide identity (ANI) between the MAGs.

#### 107 *Assessing environmental distribution of MAGs*

108 As part of the time-series microbiome survey in Monterey Bay, we previously obtained a depth-  
109 resolved dataset of 16S rRNA V4-V5 amplicon sequences, as well as metagenomes and  
110 metatranscriptomes (43,44). We were able to match one of the MAG-derived 16S rRNA

111 sequences to an operational taxonomic unit (OTU) obtained in a time-series molecular survey  
112 targeting the V4-V5 region of the 16S rRNA genes. We estimated the relative abundance of this  
113 OTU as well as several others that clustered with sequences from the MAGs (these sequences  
114 had at least 90 % sequence identity).

115

116 We used three metagenome sets for read recruitment: (i) a depth- and time-resolved metagenome  
117 dataset from Monterey Bay; (ii) a North Atlantic Ocean depth profile from the TARA Oceans  
118 dataset; and (iii) a North Pacific Ocean depth profile from the TARA Oceans dataset. Bowtie2  
119 (v2.3.5; ref. 45) was used to recruit metagenomic and metatranscriptomic reads against the  
120 MAGs. Read abundances were normalized as the number of reads mapping to kilobase of MAG  
121 per GB of metagenome (RPKG).

## 122 **Results and Discussion**

123 The MAGs assembled here represent the first high-quality genomes reported for the pSL12-like  
124 lineage (completion estimates for the two MAGs are 88.8% and 97.08%, with < 3%  
125 contamination; Table 1). Their relative placement within the phylum *Thaumarchaeota* was  
126 confirmed by both phylogenomic and single-gene phylogenetic analyses (Fig. 1). Within a  
127 maximum-likelihood tree computed using a concatenated alignment of 30 conserved core  
128 ribosomal proteins, the two MAGs were placed as a sister-clade to all known ammonia-oxidizing  
129 *Thaumarchaeota* of Group 1.1a (marine AOA) and 1.1b (soil AOA) (Fig. 1a). Similarly, based  
130 on 16S rRNA gene phylogeny, the MAGs clustered with environmental clone sequences of the  
131 pSL12-like clade (Fig. 1b). The original hot spring pSL12 lineage (including the only available

132 MAG for this lineage, DRTY7 bin\_36, assembled from a hot spring metagenome; ref. 6)  
133 comprised a distant sister clade to the marine pSL12-like group.

134 *Metabolic potential distinct from typical marine Thaumarchaeota*

135 Capacity for ammonia oxidation was not detected in either MAG, as we could not retrieve  
136 homologs of the ammonia monooxygenase (AMO) or nitrite reductase (*nirK*) genes. Moreover,  
137 the carbon-fixation pathway uniquely found in chemolithoautotrophic *Thaumarchaeota* - a  
138 modified version of the 3-hydroxypropionate/4-hydroxybutyrate (HP/HB) cycle (46) - appeared  
139 to be missing in both genomes. The myriad of copper-containing enzymes (e.g., multicopper  
140 oxidases, blue copper proteins) characteristic of AOA (47), were also missing. Since the  
141 genomes are not closed, our failure to detect these 'expected' pathways/genes does not  
142 definitively indicate their absence. However, there were striking differences in the overall  
143 genomic repertoire of typical AOA genomes and the MAGs recovered here (Fig. 2a), which  
144 cannot be explained by the lack of genome completeness alone.

145

146 None of the six canonical carbon fixation pathways were complete in the MAGs. It is possible  
147 that these *Thaumarchaeota* may use the recently described reverse oxidative TCA cycle for CO<sub>2</sub>  
148 fixation (48), since the genomes contained fumarate reductases, and 2-oxoglutarate/2-oxoacid  
149 ferredoxin oxidoreductases. In this pathway, a reversible citrate synthase catalyzes the  
150 production of citrate from acetyl CoA. Recently, metabolic reconstructions were used to predict  
151 the existence of the roTCA cycle in Aigarchaeota (6). We take caution in asserting roTCA CO<sub>2</sub>  
152 fixation in pSL12-like *Thaumarchaeota*, since genomic inference alone is not sufficient evidence  
153 for this pathway (many of the enzymes are bifunctional and common with the anabolic TCA  
154 cycle).



155

156 The presence of respiratory complexes and various organic carbon-assimilating metabolic  
157 pathways (e.g., fatty acid oxidation, sugar metabolism, amino acid degradation and potential  
158 methylo-trophy; Fig. 3) suggest that these *Thaumarchaeota* may be aerobic heterotrophs. The  
159 MAGs encoded several pyrroloquinoline quinone (PQQ)-dependent dehydrogenases containing  
160 N-terminal signal peptides (indicating extracellular localization), which can directly contribute  
161 reducing equivalents to the respiratory chain via extracellular sugar or alcohol oxidation (Fig. 3).  
162 Genome annotations suggest the potential for one-carbon (C1) compound utilization, particularly  
163 methanol and formaldehyde oxidation via a partial methylo-trophic pathway. The PQQ-dependent  
164 methanol dehydrogenases likely oxidize methanol to formaldehyde and then to formate, using  
165 the tetrahydromethanopterin (H<sub>4</sub>MPT) route. The complete pathway could not be identified in  
166 either MAG; however, F420-dependent methylene-tetrahydromethanopterin dehydrogenases  
167 (*mtd*) were present in both genomes. The tetrahydrofolate (THF) pathway for formaldehyde and  
168 formate assimilation was complete in both MAGs.

169

170 Thaumarchaeal lineages previously identified as basal groups lacking the capacity to oxidize  
171 ammonia (which were obtained from non-marine environments) are reported to possess  
172 anaerobic energy generation pathways such as sulfate or nitrate reduction (5). The MAGs  
173 assembled here contained no evidence for anaerobic respiration. Moreover, many of the genomic  
174 features identified as unique/core features for the anaerobic basal thaumarchaeal lineages in a  
175 recent comparative meta-analysis (8) were also absent in these MAGs [(i.e., pyruvate:ferredoxin  
176 oxidoreductase (*porABDG*), cytochrome bd-type terminal oxidase (*cydA*), and acetyl-CoA

177 decarboxylase/synthase (*codhAB*)]. Thus, multiple lines of evidence point to these MAGs  
178 representing a divergent, basal lineage within the aerobic, mesophilic clade of *Thaumarchaeota*.

179 *MAGs contain a methanogen-like form IIIa RuBisCO*

180 Unexpectedly, both MAGs harbored an archaeal type III ribulose-bisphosphate carboxylase  
181 (RuBisCO) gene. Hypothesized to be the most ancient form of RuBisCO, form III is  
182 predominantly found in archaea (49). Recent surveys of metagenomic datasets have revealed  
183 numerous members of the candidate phyla radiation (CPR; ref. 50,51) and DPANN archaea  
184 (41,52) also encoding a form III-like RuBisCO. A divergent variant is found in methanogenic  
185 archaea, which is categorized as form III-a. Our MAG-derived sequences clustered with the  
186 methanogen III-a RuBisCO sequences (Fig. 2b), albeit with 30-35 % amino acid identity.

187

188 Two separate studies have previously reported a form III RuBisCO in *Thaumarchaeota*, and in  
189 both cases the assembled genomes represented acidophilic terrestrial lineages: (i) *Ca.*

190 *Nitrosotalea bavarica* SbT1 was assembled and binned from an acidic peatland metagenome (53),  
191 and (ii) the deeply-branching strains BS4 and DS1 were assembled from acidic geothermal  
192 spring sediments in Yellowstone National Park (5). RuBisCO sequences from these MAGs  
193 clustered within the main archaeal form III clade (Fig. 2b), and were < 30 % identical (in the  
194 amino acid space) to the sequences we obtained in this study.

195

196 Despite exhibiting carboxylase activity in prior studies, genomic and biochemical evidence  
197 suggest that form III RuBisCO is not involved in carbon fixation via the canonical Calvin-  
198 Benson-Bassham (CBB) cycle (54,55). Regeneration of the RuBisCO substrate - ribulose 1,5-  
199 bisphosphate (RuBP) - is a key step required for the cyclization of RuBisCO-mediated carbon

200 fixation. In many archaea harboring RuBisCO, phosphoribulokinase (PRK) required for the  
201 regeneration of the RuBisCO substrate (RuBP) is missing (54), suggesting the absence of a  
202 functional CBB pathway. Intriguingly, methanogenic archaea harboring form III-a RuBisCO  
203 encode a PRK, yet are missing other key components of the CBB cycle (56). In light of these  
204 observations, two different pathways have been proposed for integrating RuBisCO-mediated  
205 CO<sub>2</sub> fixation into the central carbon metabolism of form III-harboring microorganisms.

206

207 In one, methanogenic archaea possessing form III-a RuBisCO have been demonstrated to use the  
208 reductive-hexulose-phosphate (RHP) pathway for RuBP regeneration and, thus, RuBisCO-  
209 mediated carbon fixation (56). As demonstrated in *Methanospirillum hungatei*, RuBP  
210 regeneration in the RHP pathway involves the activity of PRK, which the organism encodes (56).  
211 In these methanogens, the ribulose monophosphate (RuMP) pathway (involved in  
212 methylotrophic formaldehyde assimilation and detoxification) is hypothesized to operate in  
213 reverse, fixing CO<sub>2</sub> via RuBisCO and PRK. A key intermediate, fructose-6-phosphate, is derived  
214 from gluconeogenesis, which cyclizes the pathway (56).

215

216 While the RuBisCO sequences we retrieved from our MAGs resembled the form III-a  
217 methanogen RuBisCO (Fig. 2b), a PRK homolog could not be identified in either of the  
218 genomes. Furthermore, many of the key enzymes of the RHP and RuMP pathway were also  
219 absent, pointing to a different functional role for RuBisCO in these *Thaumarchaeota*.

220

221 The second proposed route for RuBisCO-mediated carbon metabolism involves nucleoside  
222 assimilation/ degradation via the archaeal AMP pathway (54,55). Briefly, adenosine

223 monophosphate (AMP, retrieved from the phosphorylation of nucleosides) is converted to ribose  
224 1,5-bisphosphate (R15P) by AMP phosphorylase (AMPase). Subsequently, R-15P is isomerized  
225 to ribulose 1,5-bisphosphate (RuBP) by ribose-1,5-bisphosphate isomerase (R15Pi). In an  
226 irreversible reaction, RuBisCO combines RuBP with CO<sub>2</sub> and H<sub>2</sub>O to yield 3-phosphoglycerate  
227 (3-PG), which then enters the central carbon metabolism (via glycolysis or gluconeogenesis).  
228 Sato et al. (2007; ref. 54) proposed that the reductive pentose phosphate pathway, if present, may  
229 cyclize the above-described series of transformations, effectively rendering it a carbon-fixation  
230 pathway.

231  
232 While two key enzymes of the AMP pathway - RuBisCO and R15Pi - could be identified in both  
233 MAGs, we could not detect an AMP phosphorylase (AMPase) homolog. However, even if the  
234 pSL12-like lineage lacks an AMPase, a modified version of the AMP pathway is still possible if  
235 R15P is generated from a compound other than AMP. The best candidate is phosphoribosyl  
236 pyrophosphate (PRPP), a key pentosphosphate intermediate in nucleotide biosynthesis. Both  
237 MAGs encoded a ribose-phosphate pyrophosphokinase, which forms PRPP from ribose 5-  
238 phosphate (R5P). PRPP is known to undergo abiotic disphosphorylation to yield R1,5-P (57).  
239 Alternatively, this reaction can be enzyme-mediated, most likely by a bifunctional Nudix  
240 hydrolase (58) (both MAGs contained a homolog for this gene). Thus, there potentially exists a  
241 direct route to R15P from PRPP, bypassing the requirement for an AMPase. The remaining  
242 transformations in the AMP pathway can follow as usual, generating 3-PG from RuBP.  
243 Intriguingly, both MAGs also encoded an adenine phosphoribosyltransferase, which converts  
244 PRPP to AMP. Given all of this, the archaeal AMP pathway (or a variant of it) is potentially  
245 operative in these *Thaumarchaeota*, which includes inputs from PRPP, and possibly AMP.

246 *Cyclization of the CO<sub>2</sub>-incorporation pathway via pentose phosphate pathway and*  
247 *gluconeogenesis*

248 The complete set of genes participating in the non-oxidative branch of the pentose phosphate  
249 pathway (PPP) could be identified in both MAGs (i.e., ribulose 5-phosphate isomerase, ribulose  
250 5-phosphate 3-epimerase, transaldolase and transketolase; Fig. 3). This pathway operating in  
251 reverse to generate R5P from gluconeogenesis intermediates, combined with the PRPP-(AMP)-  
252 RuBisCO transformations described above, might constitute a cyclic CO<sub>2</sub> fixation pathway  
253 (54,59) in these *Thaumarchaeota* (Fig. 3). The overall pathway can therefore be summarized as:  
254 (i) R5P formation from fructose-6-phosphate via nonoxidative PPP; (ii) conversion of R5P to  
255 PRPP; (iii) abiotic or enzyme-mediated conversion of PRPP to R15P (potentially via AMP); (iv)  
256 formation of 3-PG via the RuBisCO-mediated carboxylation reaction; and (v) conversion of 3-  
257 PG back to fructose-6-phosphate via gluconeogenesis (Fig. 3, and Fig. S1). Several of the genes  
258 coding for key enzymes in the proposed pathway appeared to be colocalized on the same  
259 assembled contigs in both MAGs (Fig. S1), suggesting potential co-expression.

260

261 A gamma-class carbonic anhydrase (CA) was present in both genomes, which catalyzes the  
262 interconversion of CO<sub>2</sub> and HCO<sub>3</sub><sup>-</sup>. Unlike the CAs observed in terrestrial AOA, the pSL12-like  
263 CAs did not contain signal peptide sequences. This suggests its involvement in intracellular  
264 reversible dehydration of HCO<sub>3</sub><sup>-</sup> to CO<sub>2</sub>, facilitating CO<sub>2</sub> incorporation via RuBisCO (or the  
265 roTCA cycle, if present).

266 *Distribution of the pSL12-like lineage in the water column*

267 To assess the environmental distribution of the MAGs, we matched the MAG-derived 16S rRNA  
268 sequences to a previously generated 16S rRNA amplicon dataset from the Monterey Bay  
269 upwelling system (43). One of the MAG-derived 16S rRNA gene sequences (from ASW8\_bin1)  
270 was an exact match to an operational taxonomic unit (OTU; #694), which comprised < 0.5% of  
271 the total thaumarchaeal abundance at any given time in the depths sampled. Three other OTUs  
272 were 90 % or more identical to the MAG-derived 16S rRNA sequences, but were much less  
273 abundant than OTU694. At any given time, this group of OTUs only comprised at most 0.5 % of  
274 thaumarchaeal abundance (Fig. 4a). As observed in previous surveys, this pSL12-like group of  
275 *Thaumarchaeota* appeared to be more abundant below the euphotic zone (11,13,15,16), with  
276 potential seasonal variations in relative abundances. Occasional abundance peaks were observed  
277 in the photic zone during spring at M1 (Fig. 4a), which likely reflects upwelled populations  
278 (station M1 is situated directly above the upwelling plume in Monterey Bay).

279

280 In recruiting metagenomic reads from Monterey Bay against the MAGs, we observed the highest  
281 recruitment at 500 m for ASW2\_bin45. ASW8\_bin1 recruited fewer reads, but appeared to have  
282 a relatively uniform abundance distribution across depths (Fig. 4b). Additionally, the relative  
283 abundances appear to change with seasonal hydrologic changes in the system (Fig. 4b).

284 Recruitment against TARA Ocean metagenomes representing Atlantic Ocean and Pacific Ocean  
285 depth profiles revealed similar depth distribution of the pSL12-like lineage (Fig. 4b).

## 286 **Conclusions**

287 In this work, we used reconstructed population genomes to infer metabolic adaptations of the  
288 elusive pSL12-like lineage of *Thaumarchaeota*, widely distributed in marine systems. The high-

289 quality genomes described here offer a first glimpse into the genomic repertoire of a marine  
290 thaumarchaeal group devoid of an exclusively chemoautotrophic energy generation strategy.  
291 Only terrestrial basal lineages of *Thaumarchaeota* have been described thus far; the MAGs  
292 presented here represent the first genomic description of a basal lineage inhabiting the marine  
293 oxic environment. In this context, an especially intriguing consideration is the relative  
294 positioning of the pSL12-like clade within the thaumarchaeal evolutionary trajectory. These  
295 MAGs may help constrain the relative timing of the acquisition of aerobic metabolism and  
296 ammonia-oxidation within the phylum.

297

298 Overall, the divergent genomic features of the pSL12-like clade significantly alter our  
299 understanding of the metabolic diversity within this abundant archaeal phylum in the oceans.  
300 While further biochemical characterization is warranted to confirm the proposed metabolic  
301 transformations, our results suggest that obligate aerobic heterotrophy might be an overlooked  
302 metabolic strategy within pelagic *Thaumarchaeota*.

### 303 **Acknowledgments**

304 Metagenome sequencing was carried out as part of a community science program (CSP) grant to  
305 C.A.F. from the DOE Joint Genome Institute. Computing for this project was performed on the  
306 Sherlock 2.0 cluster. We would like to thank Stanford University and the Stanford Research  
307 Computing Center for providing computational resources and support that contributed to the  
308 results presented here. We thank Marie Lund and Bradley B. Tolar for help with sample and data  
309 acquisition, respectively. We also thank Dr. Alfred Spormann for helpful feedback and

310 discussion on an early draft of the manuscript. This study was supported (in part) by grant OCE-  
311 1357024 from NSF Biological Oceanography (to C.A.F.).

312 **Competing Interests**

313 The authors declare no competing interests.

314



## References

1. Karner MB, DeLong EF, Karl DM. Archaeal dominance in the mesopelagic zone of the Pacific Ocean. *Nature*. 2001; 409: 507–510.
2. Oton EV, Quince C, Nicol GW, Prosser JI, Gubry-Rangin C. Phylogenetic congruence and ecological coherence in terrestrial Thaumarchaeota. *ISME J*. 2016; 10: 85–96.
3. Lin X, Handley KM, Gilbert JA, Kostka JE. Metabolic potential of fatty acid oxidation and anaerobic respiration by abundant members of Thaumarchaeota and Thermoplasmata in deep anoxic peat. *ISME J*. 2015; 9: 2740–2744.
4. Anantharaman K, Brown CT, Hug LA, Sharon I, Castelle CJ, Probst AJ, et al. Thousands of microbial genomes shed light on interconnected biogeochemical processes in an aquifer system. *Nat Comm*. 2016; 7: 1–11.
5. Beam JP, Jay ZJ, Kozubal MA, Inskeep WP. Niche specialization of novel Thaumarchaeota to oxic and hypoxic acidic geothermal springs of Yellowstone National Park. *ISME J*. 2014; 8: 938–951.
6. Hua Z-S, Qu Y-N, Zhu Q, Zhou E-M, Qi Y-L, Yin Y-R, et al. Genomic inference of the metabolism and evolution of the archaeal phylum Aigarchaeota. *Nat Comm*. 2018; 9: 208–211.
7. Weber EB, Lehtovirta-Morley LE, Prosser JI, Gubry-Rangin C, Laanbroek R. Ammonia oxidation is not required for growth of Group 1.1c soil Thaumarchaeota. *FEMS Microbiol Ecol*. 2015; 91:fiv001. doi: <https://doi.org/10.1093/femsec/fiv001>.

8. Ren M, Feng X, Huang Y, Wang H, Hu Z, Clingenpeel S, et al. Phylogenomics suggests oxygen availability as a driving force in Thaumarchaeota evolution. *ISME J.* 2019; 13: 2150–2161.
9. DeLong EF, Preston CM, Mincer T, Rich V, Hallam SJ, Frigaard N-U, et al. Community genomics among stratified microbial assemblages in the ocean's interior. *Science.* 2006; 311: 496–503.
10. Barns SM, Delwiche CF, Palmer JD, Pace NR. Perspectives on archaeal diversity, thermophily and monophyly from environmental rRNA sequences. *PNAS.* 1996; 93: 9188–9193.
11. Mincer TJ, Church MJ, Taylor LT, Preston C, Karl DM, DeLong EF. Quantitative distribution of presumptive archaeal and bacterial nitrifiers in Monterey Bay and the North Pacific Subtropical Gyre. *Environ Microbiol.* 2007; 9: 1162–1175.
12. Martin-Cuadrado A-B, Rodriguez-Valera F, Moreira D, Alba JC, Ivars-Martínez E, Henn MR, et al. Hindsight in the relative abundance, metabolic potential and genome dynamics of uncultivated marine archaea from comparative metagenomic analyses of bathypelagic plankton of different oceanic regions. *ISME J.* 2008; 2: 865–886.
13. Agogué H, Brink M, Dinasquet J, Herndl GJ. Major gradients in putatively nitrifying and non-nitrifying Archaea in the deep North Atlantic. *Nature.* 2008; 456: 788–791.
14. La Cono V, Smedile F, Ferrer M, Golyshin PN, Giuliano L, Yakimov MM. Genomic signatures of fifth autotrophic carbon assimilation pathway in bathypelagic Crenarchaeota. *Microb Biotechnol.* 2010; 3: 595–606.

15. Church MJ, Wai B, Karl DM, DeLong EF. Abundances of crenarchaeal *amoA* genes and transcripts in the Pacific Ocean. *Environ Microbiol.* 2010; 12: 679–688.
16. Tolar BB, King GM, Hollibaugh JT. An analysis of Thaumarchaeota populations from the Northern Gulf of Mexico. *Front Microbiol.* 2013; 4:72. doi: 10.3389/fmicb.2013.00072.
17. Bushnell B. BBTools software package. 2014. [sourceforge.net/projects/bbmap/](https://sourceforge.net/projects/bbmap/)
18. Li H. BFC: correcting Illumina sequencing errors. *Bioinformatics.* 2015; 31: 2885–2887.
19. Li D, Liu C-M, Luo R, Sadakane K, Lam T-W. MEGAHIT: an ultra-fast single-node solution for large and complex metagenomics assembly via succinct de Bruijn graph. *Bioinformatics.* 2015; 31: 1674–1676.
20. Li D, Luo R, Liu C-M, Leung C-M, Ting H-F, Sadakane K, et al. MEGAHIT v1.0: A fast and scalable metagenome assembler driven by advanced methodologies and community practices. *Methods.* 2016; 102: 3–11.
21. Kang D, Li F, Kirton ES, Thomas A, Egan RS, An H, et al. MetaBAT 2: an adaptive binning algorithm for robust and efficient genome reconstruction from metagenome assemblies. *PeerJ.* 2019; 7: e7359. doi: 10.7717/peerj.7359.
22. Wu Y-W, Tang Y-H, Tringe SG, Simmons BA, Singer SW. MaxBin: an automated binning method to recover individual genomes from metagenomes using an expectation-maximization algorithm. *Microbiome.* 2014; 2: 26. doi: 10.1186/2049-2618-2-26.

23. Wu Y-W, Simmons BA, Singer SW. MaxBin 2.0: an automated binning algorithm to recover genomes from multiple metagenomic datasets. *Nucleic Acids Res.* 32: 605–607. doi: 10.1093/bioinformatics/btv638.
24. Uritskiy GV, DiRuggiero J, Taylor J. MetaWRAP - a flexible pipeline for genome-resolved metagenomic data analysis. *Microbiome.* 2018; 6: 1–13.
25. Nurk S, Bankevich A, Antipov D, Gurevich A, Korobeynikov A, Lapidus A, et al. Assembling genomes and mini-metagenomes from highly chimeric reads. *J. Comput Biol.* 2013; 20: 714–737.
26. Parks DH, Imelfort M, Skennerton CT, Hugenholtz P, Tyson GW. CheckM: assessing the quality of microbial genomes recovered from isolates, single cells, and metagenomes. *Genome Res.* 2015; 25: 1043–1055.
27. Parks DH, Chuvochina M, Waite DW, Rinke C, Skarszewski A, Chaumeil P-A, et al. A standardized bacterial taxonomy based on genome phylogeny substantially revises the tree of life. *Nat Biotechnol.* 2018; 36: 996–1004.
28. Olm MR, Brown CT, Brooks B, Banfield JF. dRep: a tool for fast and accurate genomic comparisons that enables improved genome recovery from metagenomes through de-replication. *ISME J.* 2017; 11: 2864–2868.
29. Hyatt D, Chen G-L, LoCascio PF, Land ML, Larimer FW, Hauser LJ. Prodigal: prokaryotic gene recognition and translation initiation site identification. *BMC Bioinformatics.* 2010; 11: 119.

30. Seemann T. Prokka: rapid prokaryotic genome annotation. *Bioinformatics*. 2014; 30: 2068–2069.
31. Kanehisa M, Sato Y, Morishima K. BlastKOALA and GhostKOALA: KEGG Tools for functional characterization of genome and metagenome sequences. *J Mol Biol*. 2016; 428: 726–731.
32. Graham ED, Heidelberg JF, Tully BJ. Potential for primary productivity in a globally-distributed bacterial phototroph. *ISME J*. 2018; 12: 1861–1866.
33. R Core Team. R: A language and environment for statistical computing. R Foundation for Statistical Computing, Vienna, Austria (2018) (September 19, 2019). Available from: <https://www.r-project.org/>.
34. Overbeek R, Olson R, Pusch GD, Olsen GJ, Davis JJ, Disz T, et al. The SEED and the Rapid Annotation of microbial genomes using Subsystems Technology (RAST). *Nucleic Acids Res*. 2013; 42: D206–D214.
35. Elbourne LDH, Tetu SG, Hassan KA, Paulsen IT. TransportDB 2.0: a database for exploring membrane transporters in sequenced genomes from all domains of life. *Nucleic Acids Res*. 2016; 45: D320–D324.
36. Eren AM, Esen ÖC, Quince C, Vineis JH, Morrison HG, Sogin ML, et al. Anvi'o: an advanced analysis and visualization platform for 'omics data. *PeerJ*. 2015; 3: e1319. doi: 10.7717/peerj.1319.

37. Edgar RC. MUSCLE: multiple sequence alignment with high accuracy and high throughput. *Nucleic Acids Res.* 2004; 32: 1792–1797.
38. Price MN, Dehal PS, Arkin AP. FastTree 2 – approximately maximum-likelihood trees for large alignments. *PLoS ONE.* 2010; 5: e9490. doi: 10.1371/journal.pone.0009490.
39. Altschul SF, Gish W, Miller W, Myers EW, Lipman DJ. Basic local alignment search tool. *J Mol Biol.* 1990; 215: 403–410.
40. Katoh K, Misawa K, Kuma KI, Miyata T. MAFFT: a novel method for rapid multiple sequence alignment based on fast Fourier transform. *Nucleic Acids Res.* 2002; 30: 3059–3066.
41. Jaffe AL, Castelle CJ, Dupont CL, Banfield JF. Lateral gene transfer shapes the distribution of RuBisCO among Candidate Phyla Radiation Bacteria and DPANN Archaea. *Mol Biol Evol.* 2019; 36: 435–446.
42. Jain C, Rodriguez-R LM, Phillippy AM, Konstantinidis KT, Aluru S. High throughput ANI analysis of 90K prokaryotic genomes reveals clear species boundaries. *Nat Comm.* 2018; 9: 1–8.
43. Reji L, Tolar BB, Smith JM, Chavez FP, Francis CA. Differential co-occurrence relationships shaping ecotype diversification within Thaumarchaeota populations in the coastal ocean water column. *ISME J.* 2019; 13: 1144–1158.
44. Reji L, Tolar BB, Smith JM, Chavez FP, Francis CA. Depth distributions of nitrite reductase (*nirK*) gene variants reveal spatial dynamics of thaumarchaeal ecotype

- populations in coastal Monterey Bay. *Environ Microbiol.* 2019; 21: 4032-4045. doi: 10.1111/1462-2920.14753.
45. Ben Langmead, Salzberg SL. Fast gapped-read alignment with Bowtie 2. *Nat Methods.* 2012; 9: 357–359.
  46. Könneke M, Schubert DM, Brown PC, Hügler M, Standfest S, Schwander T, et al. Ammonia-oxidizing archaea use the most energy-efficient aerobic pathway for CO<sub>2</sub> fixation. *PNAS.* 2014; 111: 8239–8244.
  47. Kerou M, Offre P, Valledor L, Abby SS, Melcher M, Nagler M, et al. Proteomics and comparative genomics of *Nitrososphaera viennensis* reveal the core genome and adaptations of archaeal ammonia oxidizers. *PNAS.* 2016; 113: E7937-E7946. doi: 10.1073/pnas.1601212113.
  48. Mall A, Sobotta J, Huber C, Tschirner C, Kowarschik S, Bacnik K, et al. Reversibility of citrate synthase allows autotrophic growth of a thermophilic bacterium. *Science.* 2018; 359: 563–567.
  49. Erb TJ, Zarzycki J. A short history of RubisCO: the rise and fall (?) of Nature's predominant CO<sub>2</sub> fixing enzyme. *Curr Opin Biotechnol.* 2018; 49: 100–107.
  50. Wrighton KC, Castelle CJ, Varaljay VA, Satagopan S, Brown CT, Wilkins MJ, et al. RubisCO of a nucleoside pathway known from Archaea is found in diverse uncultivated phyla in bacteria. *ISME J.* 2016; 10: 2702–2714.

51. Wrighton KC, Thomas BC, Sharon I, Miller CS, Castelle CJ, VerBerkmoes NC, et al. Fermentation, hydrogen, and sulfur metabolism in multiple uncultivated bacterial phyla. *Science*. 2012; 337: 1661–1665.
52. Castelle CJ, Wrighton KC, Thomas BC, Hug LA, Brown CT, Wilkins MJ, et al. Genomic expansion of domain Archaea highlights roles for organisms from new phyla in anaerobic carbon cycling. *Curr Biol*. 2015; 25: 690–701.
53. Herbold CW, Lehtovirta-Morley LE, Jung M-Y, Jehmlich N, Hausmann B, Han P, et al. Ammonia-oxidising archaea living at low pH: Insights from comparative genomics. *Environ Microbiol*. 2017; 19: 4939–4952.
54. Sato T, Atomi H, Imanaka T. Archaeal type III RuBisCOs function in a pathway for AMP metabolism. *Science*. 2007; 315: 1003–1006.
55. Aono R, Sato T, Imanaka T, Atomi H. A pentose bisphosphate pathway for nucleoside degradation in Archaea. *Nat Chem Biol*. 2015; 11: 355–360.
56. Kono T, Mehrotra S, Endo C, Kizu N, Matusda M, Kimura H, et al. A RuBisCO-mediated carbon metabolic pathway in methanogenic archaea. *Nat Comm*. 2017; 8: 1–12.
57. Finn MW, Tabita FR. Modified pathway to synthesize ribulose 1,5-bisphosphate in methanogenic Archaea. *J Bacteriol*. 2004; 186: 6360–6366.
58. Fisher DI, Safrany ST, Strike P, McLennan AG, Cartwright JL. Nudix hydrolases that degrade dinucleoside and diphosphoinositol polyphosphates also have 5-



phosphoribosyl 1-pyrophosphate (PRPP) pyrophosphatase activity that generates the glycolytic activator ribose 1,5-bisphosphate. *J Biol Chem.* 2002; 277: 47313–47317.

59. Falb M, Müller K, Königsmaier L, Oberwinkler T, Horn P, Gronau von S, et al. Metabolism of halophilic archaea. *Extremophiles.* 2008; 12: 177–196.

## Figures and Tables

**Table 1: MAG statistics.**

| MAG ID     | Completion | Contamination | Number of contigs | N50   | Number of bases |
|------------|------------|---------------|-------------------|-------|-----------------|
| ASW8_bin1  | 97.08 %    | 2.912 %       | 91                | 16957 | 996535          |
| ASW2_bin45 | 88.83 %    | 0.97 %        | 46                | 35482 | 918577          |

Estimates of genome completeness and contamination.

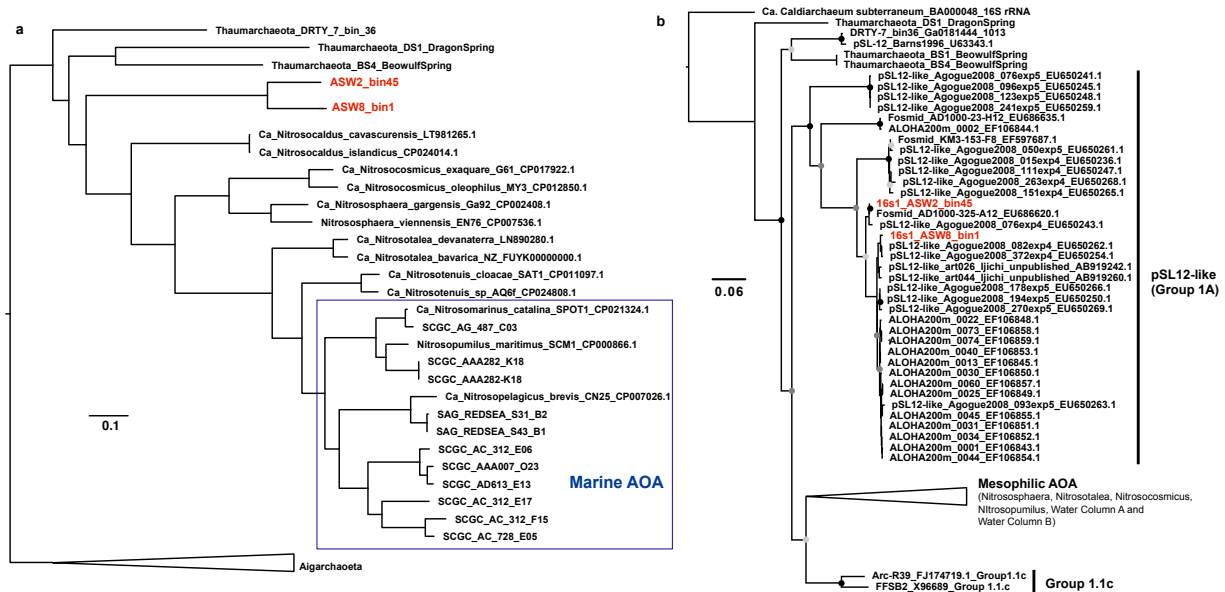

**Figure 1. The assembled genomes cluster within the marine pSL12-like thaumarchaeal lineage. a**, Phylogenomic tree computed using a concatenated alignment of 30 ribosomal proteins. **b**, Phylogeny of MAG-derived 16S rRNA gene sequences with genomic reference sequences.

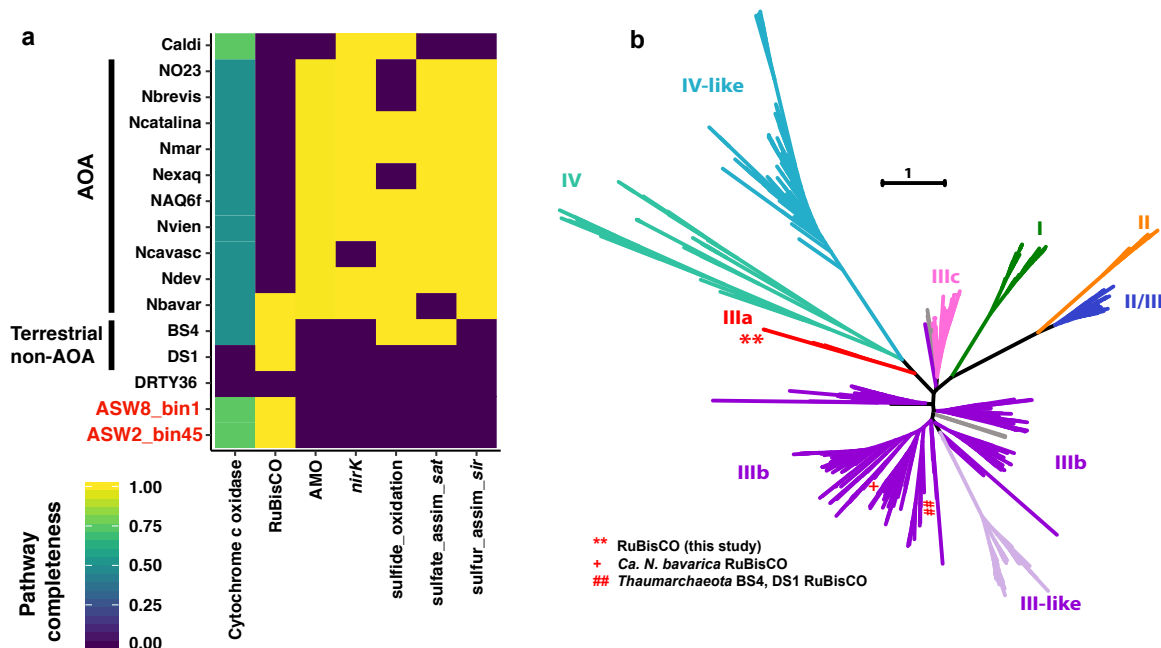

**Figure 2: Metabolic capabilities of pSL12-like clade distinct from typical AOA. a,**

Comparison of selected metabolic pathways across thaumarchaeal genomes. pSL12-like MAGs are highlighted in red. *Caldiarchaenum subterraneum* belonging to the closely-related Phylum Aigarchaeota, is also included for comparison. Caldi: *Ca. subterraneum*; NO23: SCGC AAA007 O23; Nbrevis: *Ca. Nitrosopelagicus brevis* CN25; Ncatalina: *Ca. Nitrosomarinus catalina* SPOT01; Nexaq: *Ca. Nitrosocosmicus exaquare*; NAQ6f: *Ca. Nitrosotenuis aquarius* AQ6f; Nvien: *Nitrososphaera viennensis*; Ncavasc: *Ca. Nitrosocaldus cavascurensis*; Ndev: *Ca. Nitrosotalea devanaterre*; Nbavar: *Ca. Nitrosotalea bavarica*; BS4: *Thaumarchaeota* archaeon BS4 (MAG); DS1: *Thaumarchaeota* archaeon DS1 (MAG); and DRTY36: DRTY-7 bin\_36 (MAG). **b,** Phylogenetic tree of RuBisCO sequences computed in FastTree using a MAFFT alignment of amino acid sequences. The MAG-derived RuBisCO sequences are highlighted. Previously reported thaumarchaeal RuBisCO sequences are also highlighted.

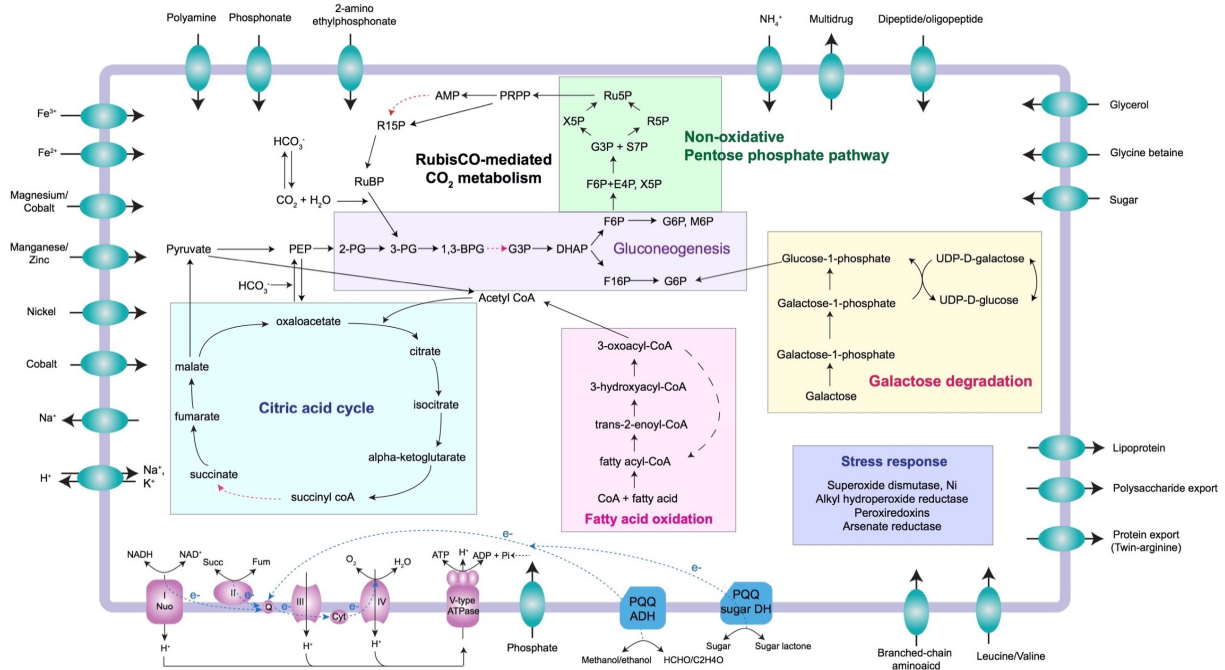

**Figure 3: Overview of metabolic potential based on metabolic reconstructions of the pSL12-like MAGs.** Red dashed arrows indicate unidentified genes. The TCA cycle is presented in the anabolic direction. For detailed gene information, see Supplementary Dataset 1.

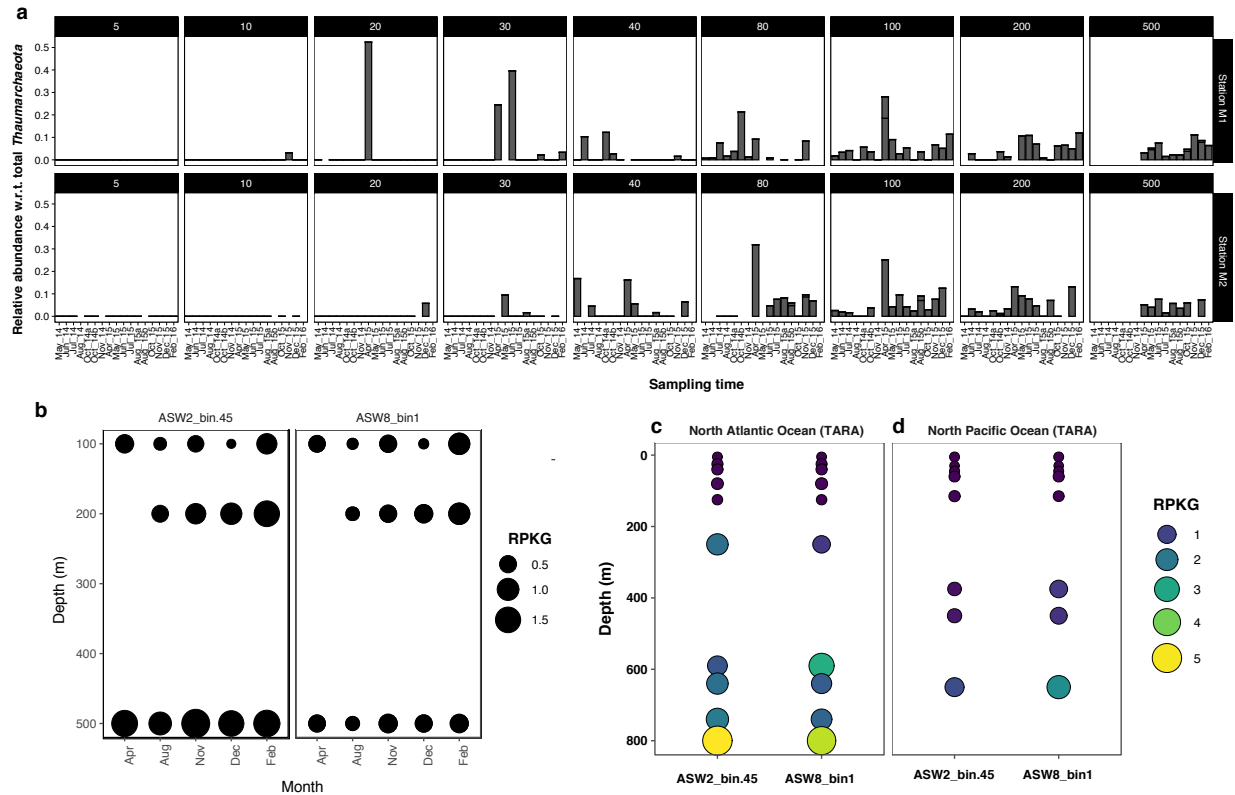

**Figure 4:** Distribution of pSL12-like lineage in Monterey Bay waters. **a**, Relative abundances (as a percentage of total thaumarchaeal abundance) of OTUs  $\geq 90\%$  identical to the 16S rRNA gene sequences retrieved from the MAGs. The 2 major panels correspond to two sampling stations, M1 and M2, in Monterey Bay. Each subpanel represents a depth gradient between 5 - 500 m. **b**, Read recruitments of each MAG against Monterey Bay metagenomes. Size of the circle corresponds to normalized abundance. **c and d**, Metagenome read recruitments against Atlantic Ocean and Pacific Ocean depth profiles, respectively, from the TARA Oceans dataset. Relative abundances are presented as number of reads mapped per kilobases of genome per gigabases of metagenome (RPKG). Metagenome sample accessions are given in Table S1.
